# Supplementary material
Source: Springer Nature journal article supplement (https://www.springermedizin.de/resource/supplementary/12889_2014_7376_MOESM2_ESM.pdf/9497398)

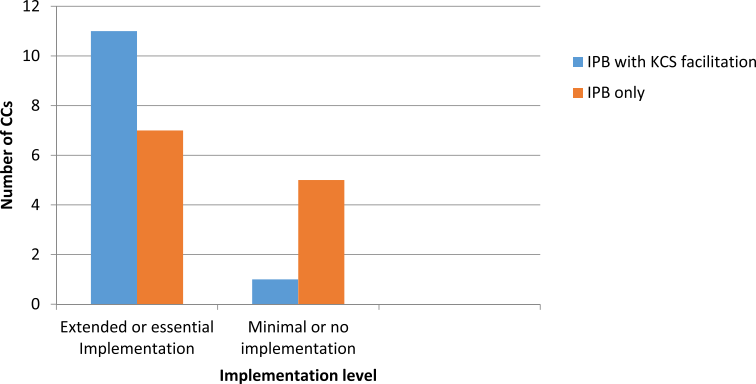

Supplement: MOESM2 [file 9497398]
